# Supplementary material
Source: PubMed Central journal article supplement (PMC11645782)
Supplement: NIHMS1928409-supplement-Supplementary_figures.pdf [file NIHMS1928409-supplement-Supplementary_figures.pdf]

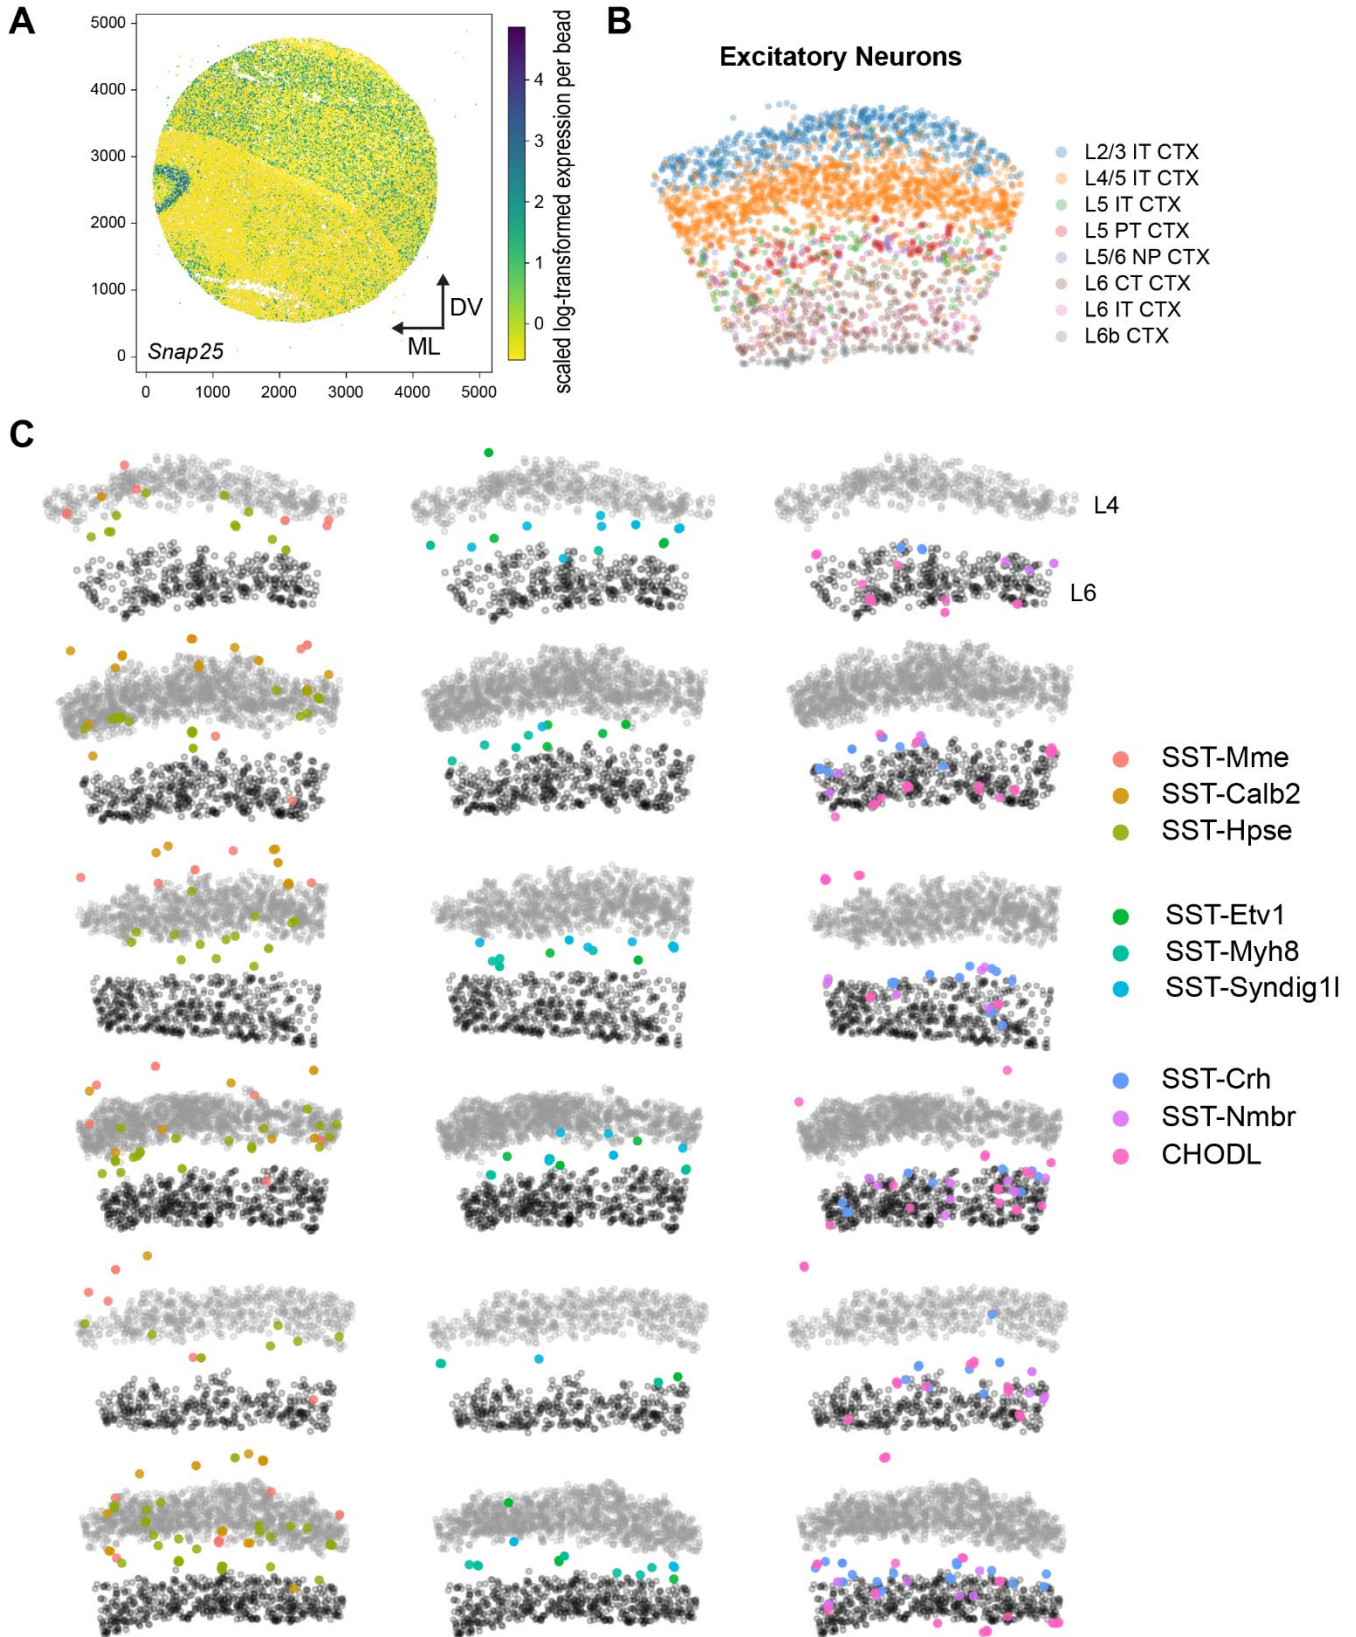

**Figure S1. Slide-seq V2 method: identification of cortical region, excitatory neuron assignment and SST subtype distribution in the other six experiments. Related to STAR Method and Figure 1.**

(A) Expression of the *Snap25* gene can assist in defining the cortex region in a coronal section of a mouse brain processed by Slide-seq V2 (same experiment as shown in [Figure 1C](#)). Each dot represents a bead colored according to the scaled log-transformed expression level of the *Snap25* gene. Any subsequent analysis is restricted to the cortical region where all cortical layers are represented (highlighted region).

(B) Same tissue section as in (A), with dots colored by their predicted identity according to the assignment by robust cell type decomposition (RCTD). Only excitatory neurons are shown.

(C) The rest six Slide-seq V2 experiments in the S1 region with RCTD-predicted SST interneurons labeled. Grey circles showing the location of L4 and L6 excitatory neurons for reference.

| Probe Gene Names   | <i>Calb2</i>       | <i>Hpse</i>  | <i>Cbln4</i>          | <i>Pdyn</i>              | <i>Crh</i> | <i>Chodl</i> |
|--------------------|--------------------|--------------|-----------------------|--------------------------|------------|--------------|
| High Expression In | SST-Calb2<br>CHODL | SST-Hpse     | SST-Calb2<br>SST-Hpse | SST-Syndig1l<br>SST-Hpse | SST-Crh    | CHODL        |
| Low Expression In  | SST-Mme            | SST-Syndig1l | SST-Mme               | SST-Calb2<br>SST-Nmbr    | SST-Nmbr   |              |

**Table S1. List of smFISH probes and their expression levels in different SST subtypes. Related to Figure 1.**

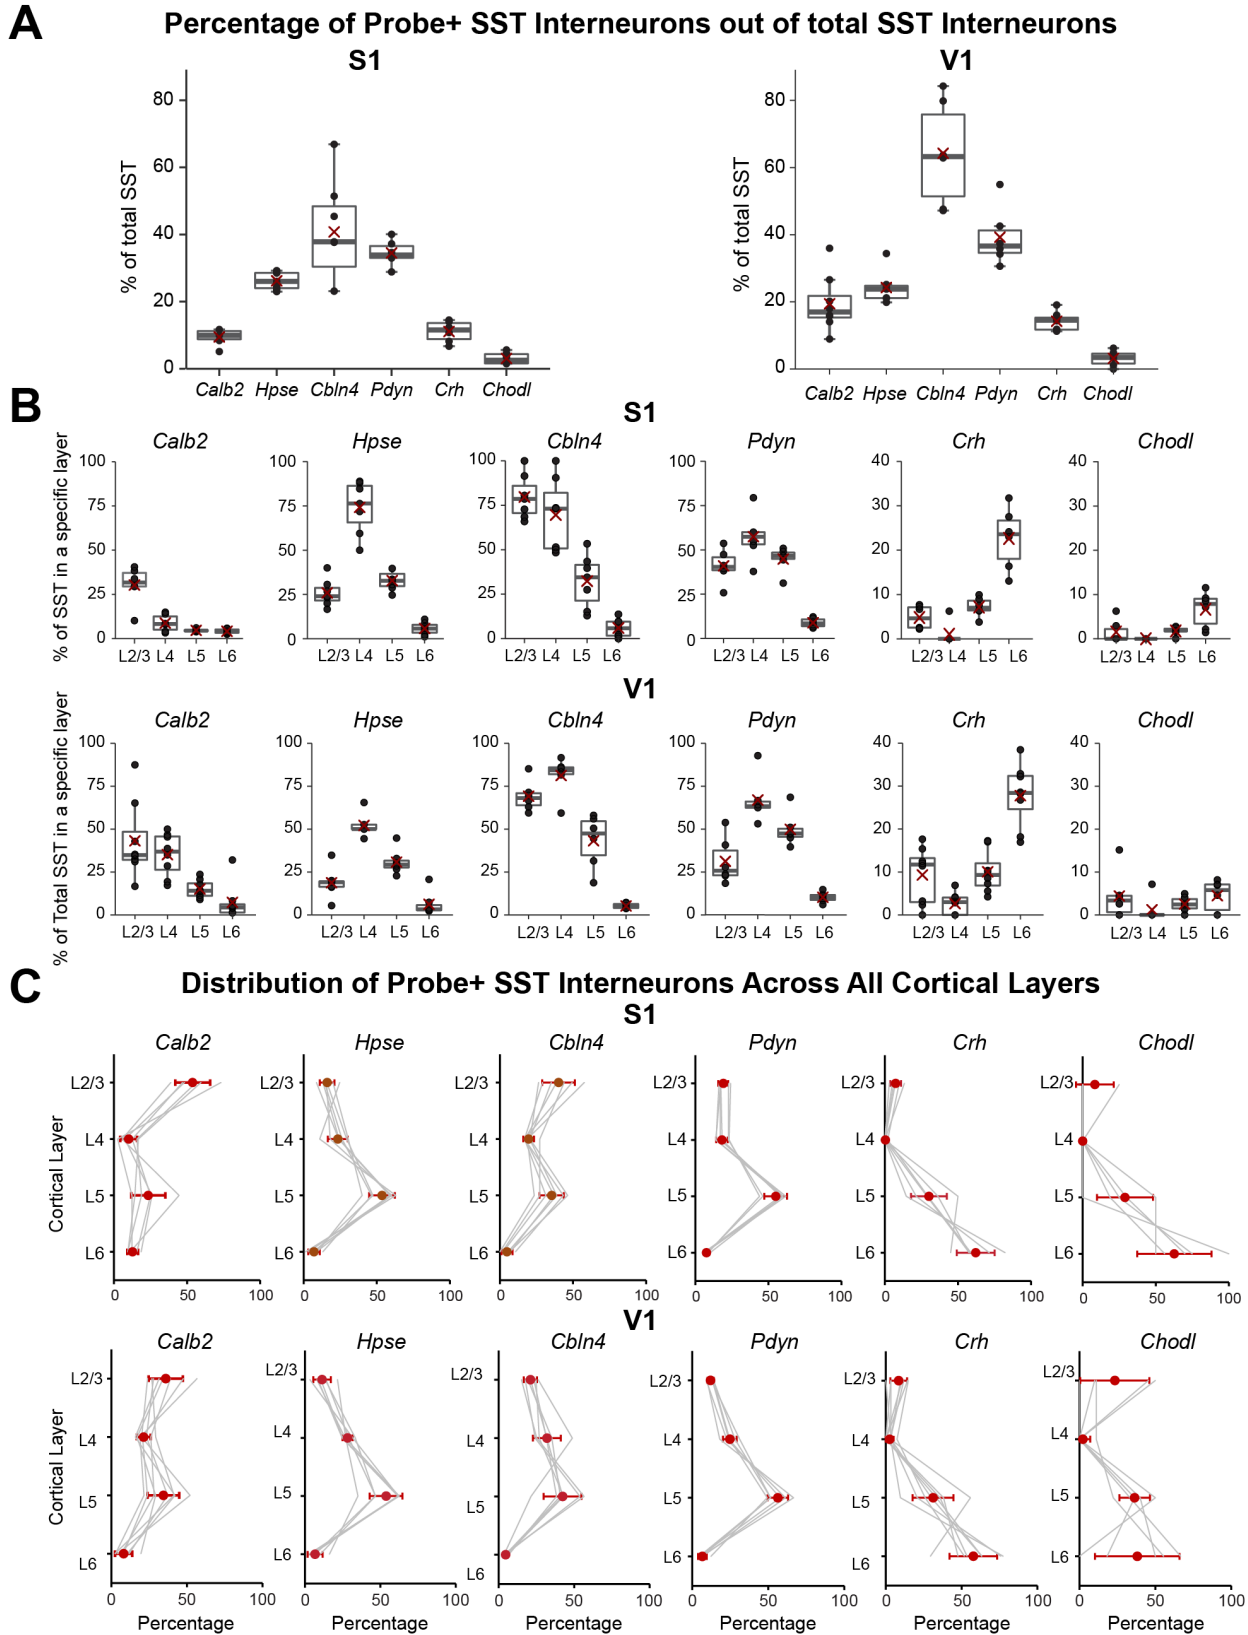

**Figure S2. Quantification of smFISH experiments against different marker genes for various SST subtypes. Related to Figure 1.**

smFISH experiments against *Calb2*, *Hpse*, *Cbln4*, *Pdyn*, *Crh*, and *Chodl* mRNA were performed on 1-2 month old mice. For the majority of the experiments, total SST interneurons were genetically labeled by *Sst<sup>Cre</sup>*; *Ail4* and were visualized by the endogenous fluorescence of tdTomato protein. Alternatively, SST interneurons were labeled either by immunostaining against GFP protein of *Sst<sup>Cre</sup>*; *RCE* mice, or by smFISH against *Sst* transcripts. Each data point represents quantification from one experimental image. *Calb2*: n = 3 mice, total 2034 SST interneurons examined in S1; n = 5 mice, total 1866 SST interneurons examined in V1. *Hpse*: n = 4 mice, total 2161 SST interneurons examined in S1; n = 4 mice, total 1784 SST interneurons examined in V1. *Cbln4*: n = 4 mice, total 1649 SST interneurons examined in S1; n = 3 mice, total 822 SST interneurons examined in V1. *Pdyn*: n = 3 mice, total 1892 SST interneurons examined in S1; n = 4 mice, total 1133 SST interneurons examined in V1. *Crh*: n = 3 mice, total 2131 SST interneurons examined in S1; n = 4 mice, total 1676 SST interneurons examined in V1. *Chodl*: n = 3 mice, total 1491 SST interneurons examined in S1; n = 3 mice, total 1176 SST interneurons examined in V1.

- (A). Percentage of total SST interneurons in S1 (left) and V1 (right) that express specific marker genes as identified in smFISH experiments. Red crosses represent the mean value.
- (B). Percentage of SST interneurons expressing specific marker genes in each layer in S1 (upper row) and V1 (lower row), as identified in smFISH experiments. Red crosses represent the mean value.
- (C) The laminar distribution of SST interneurons expressing specific marker genes in S1 (upper row) and V1 (lower row). Red dots with whiskers represent mean  $\pm$  SD.

| <b>SST Subtype</b> | <b>Cell#</b> | <b>Percentage</b> |
|--------------------|--------------|-------------------|
| SST-Mme            | 196          | 12.55%            |
| SST-Calb2          | 307          | 19.65%            |
| SST-Hpse           | 230          | 14.72%            |
| SST-Etv1           | 41           | 2.62%             |
| SST-Myh8           | 221          | 14.15%            |
| SST-Syndig1l       | 60           | 3.84%             |
| SST-Crh            | 232          | 14.85%            |
| SST-Nmbr           | 208          | 13.32%            |
| CHODL              | 67           | 4.29%             |

**Table S2. Proportions of different SST subtypes in the snRNA-seq dataset of P28 cortical interneurons in V1. Related to Figure 1.**

| SST Subtypes                      | Genetic Strategy                                          | Boolean Logic               |
|-----------------------------------|-----------------------------------------------------------|-----------------------------|
| CHODL                             | <i>Nos1</i> <sup>CreER</sup> ; <i>Sst</i> <sup>FlpO</sup> | Cre AND Flp                 |
| SST-Calb2<br>CHODL                | <i>Calb2</i> <sup>Cre</sup> ; <i>Sst</i> <sup>FlpO</sup>  | Cre AND Flp                 |
| SST-Etv1<br>SST-Mme<br>SST-Calb2* | <i>Etv1</i> <sup>CreER</sup> ; <i>Sst</i> <sup>FlpO</sup> | Cre AND Flp                 |
| SST-Myh8                          | <i>Chrna2-Cre</i>                                         | Cre only                    |
| SST-Hpse<br>SST-Calb2             | <i>Pdyn</i> <sup>Cre</sup> ; <i>Npy</i> <sup>FlpO</sup>   | Cre AND Flp                 |
| SST-Syndig1l<br>SST-Hpse*         | <i>Pdyn</i> <sup>CreER</sup>                              | Cre only <sup>†</sup>       |
| SST-Hpse<br>SST-Syndig1l          | <i>Hpse</i> <sup>Cre</sup>                                | Cre only <sup>†</sup>       |
| SST-Syndig1l                      | <i>Pdyn</i> <sup>CreER</sup> ; <i>Npy</i> <sup>FlpO</sup> | Cre-ON/Flp-OFF              |
| SST-Syndig1l                      | <i>Pdyn</i> <sup>Cre</sup> ; <i>Npy</i> <sup>FlpO</sup>   | Cre-ON/Flp-OFF <sup>†</sup> |
| SST-Crh                           | <i>Crh</i> <sup>Cre</sup> ; <i>Sst</i> <sup>FlpO</sup>    | Cre AND Flp                 |
| SST-Nmbr                          | <i>Crhr2</i> <sup>Cre</sup> ; <i>Sst</i> <sup>FlpO</sup>  | Cre AND Flp                 |
| PV/SST-Th<br>SST-Mme              | <i>Tac1</i> <sup>Cre</sup> ; <i>Sst</i> <sup>FlpO</sup>   | Cre AND Flp                 |

**Table S3. Genetic strategies targeting different SST subtypes. Related to Figure 2.**

For genetic strategies that target multiple SST subtypes, the list of SST subtypes was arranged with the primary target on the top and the minor target at the bottom. \* following specific SST subtype suggests that this subtype was labeled in variable degrees depending on the extent of Cre recombination. † indicates genetic strategies that work only at a certain age range. *Hpse*<sup>Cre</sup> shows germline recombination. *Pdyn*<sup>Cre</sup> is expressed in a subset of excitatory neurons during development. Note that although *Crh* gene is expressed in a small subset of SST-Nmbr interneurons. However, due to the low efficacy of *Crh*<sup>Cre</sup> line in labeling SST-Crh interneurons, we believe the chance of this genetic strategy labeling SST-Nmbr is low. The developmental expression of *Tac1* gene in PV/SST-Th subtype caused the labeling of L6 interneurons of this intersectional strategy.

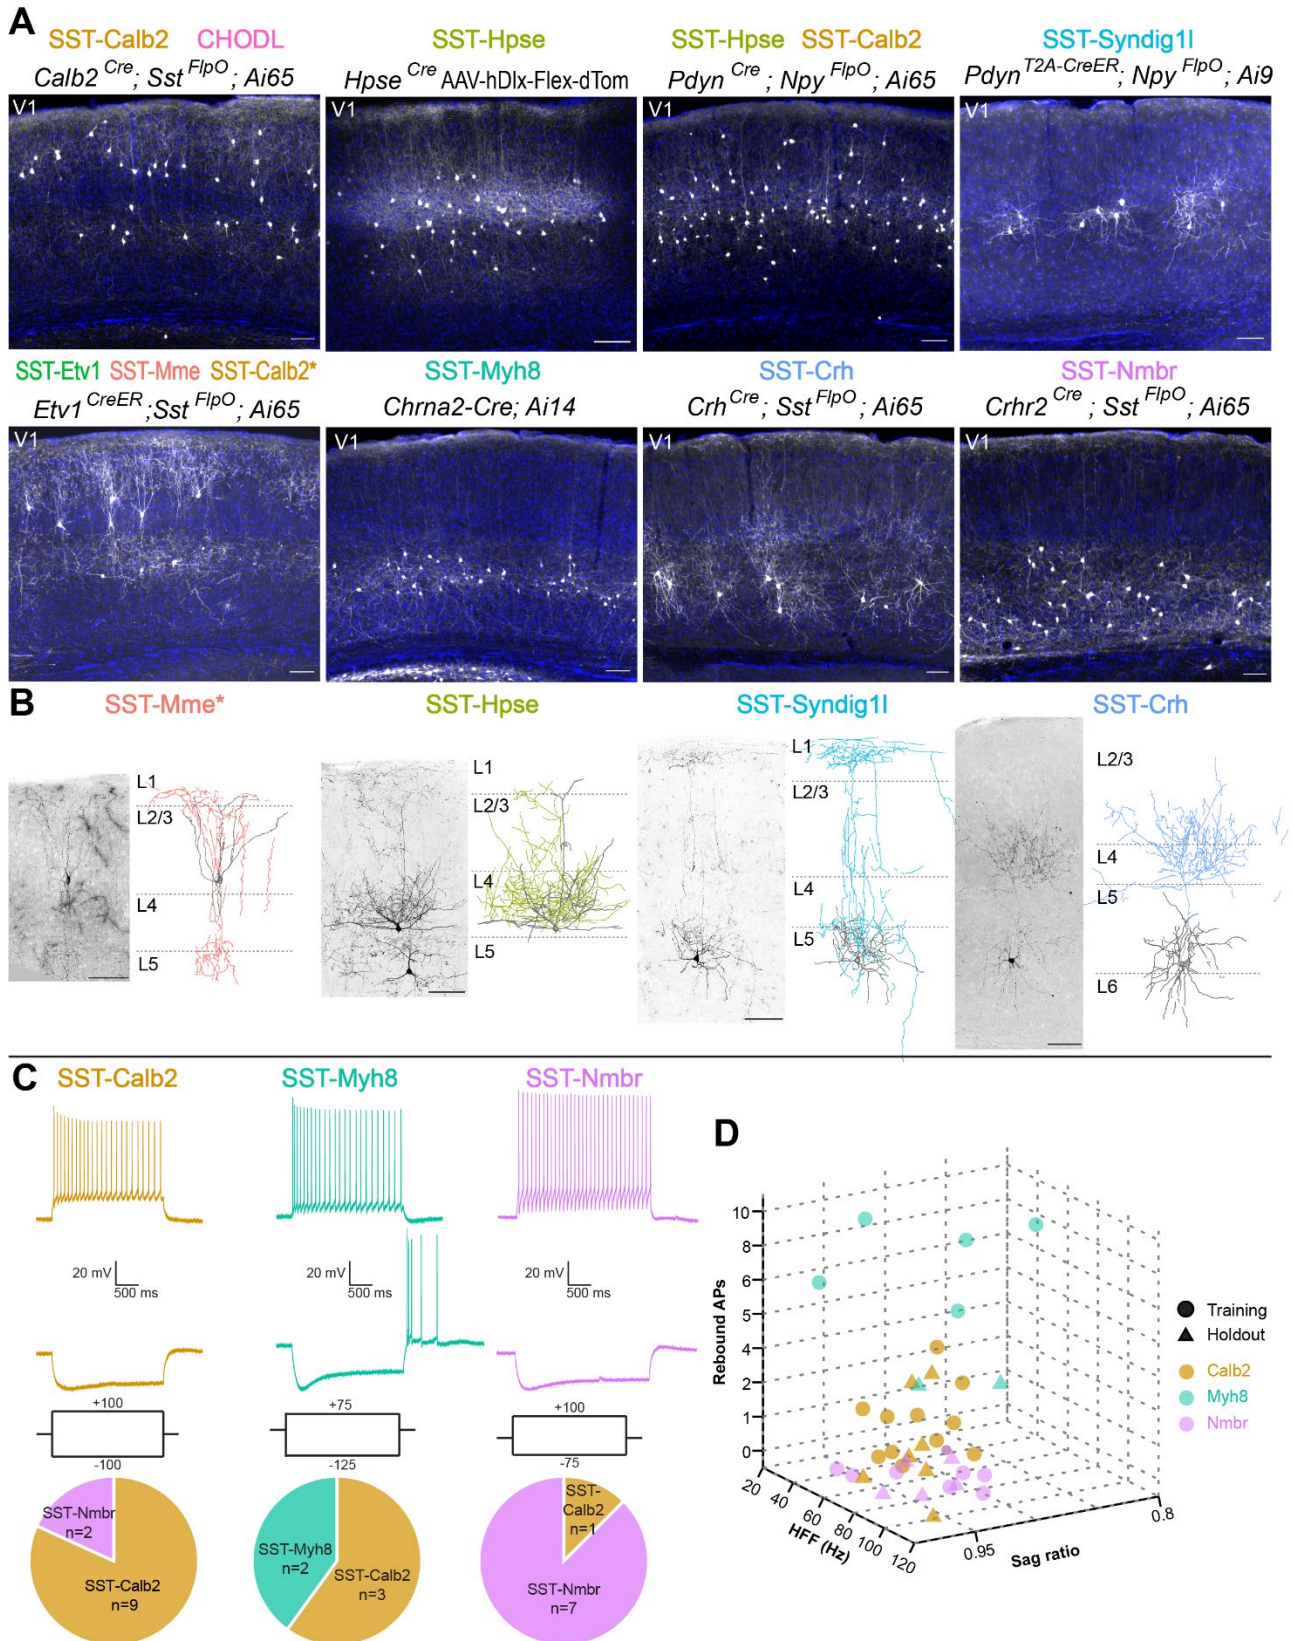

**Figure S3. Genetic labeling and single-neuron reconstruction of selected SST subtypes in V1; intrinsic electrophysiological properties of three SST subtypes in S1. Related to Figure 2.**



(A) Representative images of selective genetic strategies targeting SST subtypes in V1, with DAPI counterstaining for laminar distribution. All images were taken from 1-3 month old mice. The *Ai9* reporter line is used here as a Cre-ON/Flp-OFF strategy because the FRT sites flanking the mutation are still retained in this mouse line. With this reporter line, SST-Hpse interneurons were occasionally observed in *Pdyn<sup>T2A-CreER</sup>; Npy<sup>FlpO</sup>; Ai9* strategy, likely due to incomplete FlpO recombination, though not noted in this representative image. For SST-Hpse labeling, rAAV9-hDlx-Flex-dTomato virus was stereotaxically injected in *Hpse<sup>Cre</sup>* mice in V1 at 1 month old and examined 13 days post-injection. \* indicates that SST-Calb2 interneurons may be present in this example (see also [Figure S5B](#)). Scale bars, 100  $\mu$ m.

(B) Sparse labeling of selective SST subtypes in V1. Images of genetic labeling are shown to the left of the NeuroLucida reconstruction of single-neuron morphology. \*Note that the example of SST-Mme sparse labeling was targeted by the intersectional strategy of *Etv1<sup>CreER</sup>; Sst<sup>FlpO</sup>; RC::FPSit*, which could also label SST-Etv1 and a varying degree of SST-Calb2. Because this example neuron resides in L2/3, whereas SST-Etv1 interneurons are expected to primarily reside in L5a, and that the chance of labeling SST-Calb2 is relatively low due to the low level of recombination, we infer that the identity of this labeled neuron is most likely SST-Mme. SST-Hpse and SST-Syndig11 interneurons are both labeled by *Pdyn<sup>T2A-CreER</sup>; Ai14* strategy and differentiated by their unique morphology. SST-Crh interneuron is labeled by *Crh<sup>Cre</sup>; Sst<sup>FlpO</sup>; RC::FPSit*. All reconstructions were derived using sparse labeling of specific SST subtypes from P25-73 mice. Scale bars, 100  $\mu$ m.

(C) Representative traces of three SST subtypes in response to current injections. SST-Calb2 (n = 21, 3 mice), SST-Myh8 (n = 12, 3 mice), and SST-Nmbr (n = 13, 3 mice) all showed regular-spiking adapting firing patterns (top). Pie charts showing the number of cells classified as SST-Calb2, SST-Myh8, and SST-Nmbr interneurons by a trained k-nearest neighbor classifier (bottom, from left to right). Also see [Table S5-6](#).

(D) 3D plot of the three most predictive features in the nearest neighbor analysis.

| SST Subtype         | Adult Marker Genes                          | Resident Layer                       | Axonal Project Pattern | Putative Cell Type                                                    | Tasic <i>et al.</i> , 2018 clusters                                     |
|---------------------|---------------------------------------------|--------------------------------------|------------------------|-----------------------------------------------------------------------|-------------------------------------------------------------------------|
| <b>SST-Mme</b>      | <i>Tac1, Necab1, Fam43a</i>                 | L2/3                                 | L1, L2/3               | Martinotti cell                                                       | Sst Tac1 Tacr3<br>Sst Tac1 Htr1d<br>Sst Mme Fam114a1                    |
| <b>SST-Calb2</b>    | <i>Pcsk5</i>                                | L2/3, L5a (S1)<br>L2/3, L4, L5a (V1) | L1, L2/3               | Fanning-out Martinotti cell                                           | Sst Calb2 Pdlim5<br>Sst Calb2 Necab1                                    |
| <b>SST-Hpse</b>     | <i>Ascl2</i>                                | L4, L5a                              | L4                     | L4-targeting non-Martinotti cell                                      | Sst Hpse Cbln4                                                          |
| <b>SST-Etv1</b>     | <i>Mstn</i>                                 | L5                                   | L1, L2/3               | Martinotti cell                                                       | Sst Nr2f2 Necab1<br>Sst Myh8 Etv1                                       |
| <b>SST-Myh8</b>     | <i>Chrna2, Plpp4, Cartpt, Myh13, Glra3</i>  | L5b                                  | L1, L5                 | T-shaped Martinotti cell                                              | Sst Chrna2 Glra3<br>Sst Myh8 Fibin<br>Sst Myh8 Etv1<br>Sst Chrna2 Ptgdr |
| <b>SST-Syndig1l</b> | <i>C1qtnf7, Pdyn, Prdm1</i>                 | L5a                                  | L1                     | T-shaped Martinotti cell                                              | Sst Hpse Sema3c<br>Sst Chrna2 Ptgdr                                     |
| <b>SST-Crh</b>      | <i>Rxfp1, Prdm8, Ptpkr, Lmo1</i>            | L5b, L6                              | L4, L5/6               | L4-targeting non-Martinotti cell                                      | Sst Rxfp1 Prdm8<br>Sst Rxfp1 Eya1<br>Sst Tac2 Tacstd2                   |
| <b>SST-Nmbr</b>     | <i>Lpar1, Esm1, Crhr2</i>                   | L6                                   | L5/6                   | L5/6-targeting non-Martinotti cell                                    | Sst Crh 4930553C11Rik<br>Sst Crhr2 Efemp1<br>Sst Esm1<br>Sst Tac2 Myh4  |
| <b>CHODL</b>        | <i>Nos1, Sfrp1, Ntn1, Rasgef1b, Carhsp1</i> | L6                                   | L6, long-range         | <i>Nos1</i> <sup>+</sup> non-Martinotti, long-range projecting neuron | Sst Chodl                                                               |

**Table S4. Summary of the current understanding about different SST subtypes. Related to Figure 2.**

# S1

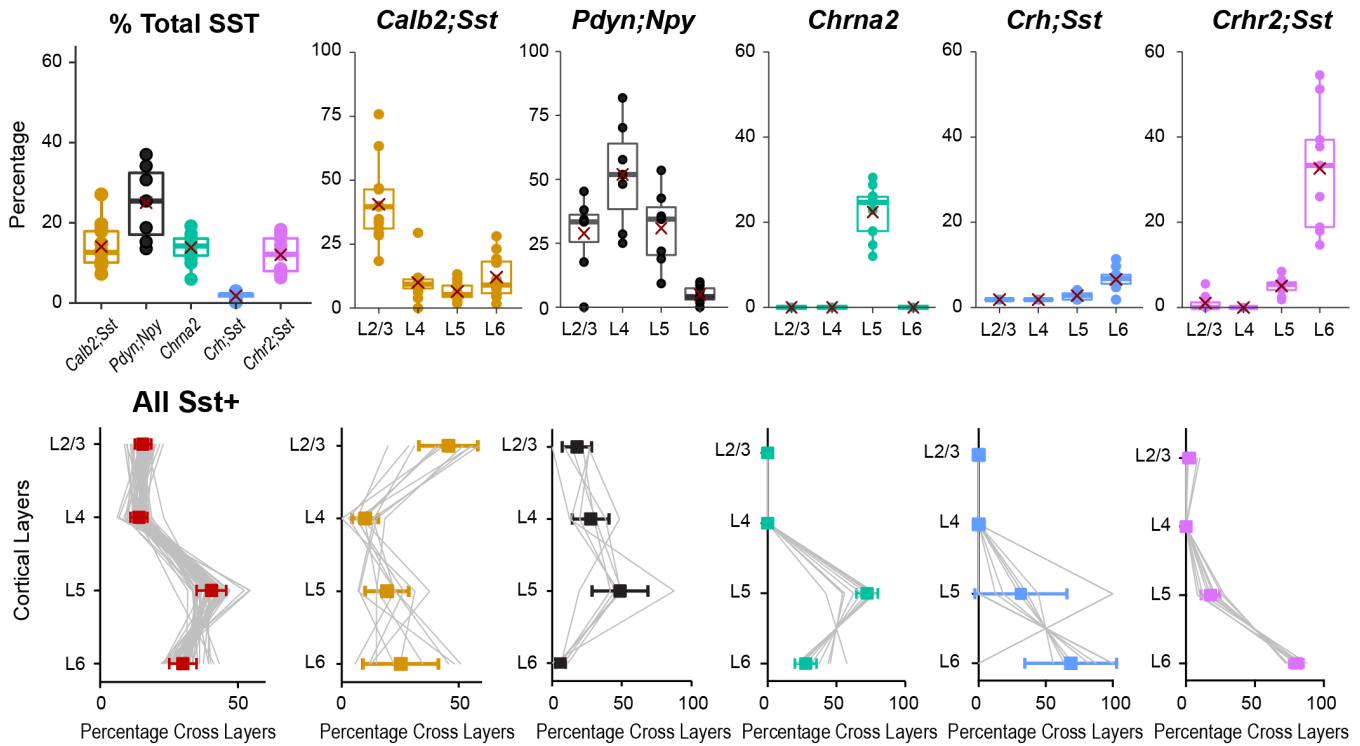

# V1

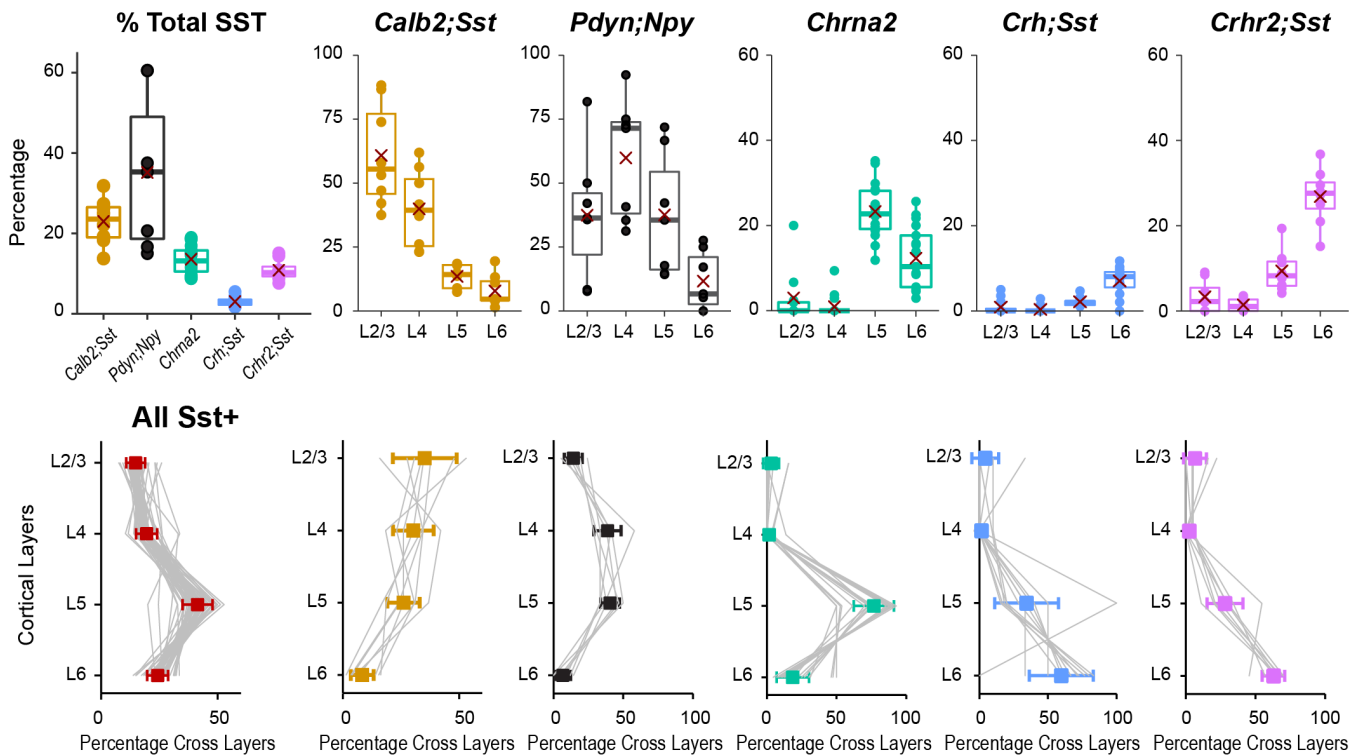

**Figure S4. Proportion and distribution of SST subtypes across cortical layers in S1 and V1.  
Related to Figure 2.**

Total SST interneurons were labeled with smFISH against *Sst* mRNA. Genetic labeling was visualized either by endogenous fluorescence or by immunostaining against reporter protein. All experiments were performed on 1-2 month old transgenic mice. Each data point represents quantification from one experimental image.

*Calb2<sup>Cre</sup>; Sst<sup>FlpO</sup>; Ai65*: 4 mice, total 4042 SST interneurons examined in S1; 4 mice, total 1090 SST interneurons examined in V1.

*Pdyn<sup>Cre</sup>; Npy<sup>FlpO</sup>; Ai65*: 3 mice, total 1352 SST interneurons examined in S1; 3 mice, total 775 SST interneurons examined in V1.

*Chrna2-Cre; Ai14*: 4 mice, total 3364 SST interneurons examined in S1; 6 mice, total 2446 SST interneurons examined in V1.

*Crh<sup>Cre</sup>; Sst<sup>FlpO</sup>; Ai65*: 3 mice, total 5314 SST interneurons examined in S1; 3 mice, total 3793 SST interneurons examined in V1.

*Crhr2<sup>Cre</sup>; Sst<sup>FlpO</sup>; Ai65*: 4 mice, total 2519 SST interneurons examined in S1; 4 mice, total 1613 SST interneurons examined in V1.

(S1, top row) The proportion of genetically labeled neurons out of total SST interneurons (leftmost) or SST interneurons in each layer (rest) in S1.

(S1, second row) Laminar distribution of all SST interneurons (leftmost) or genetically labeled neurons by each strategy (rest) in S1.

(V1) Parallel quantifications performed in V1.

**A** smFISH experiments against various SST subtype marker genes

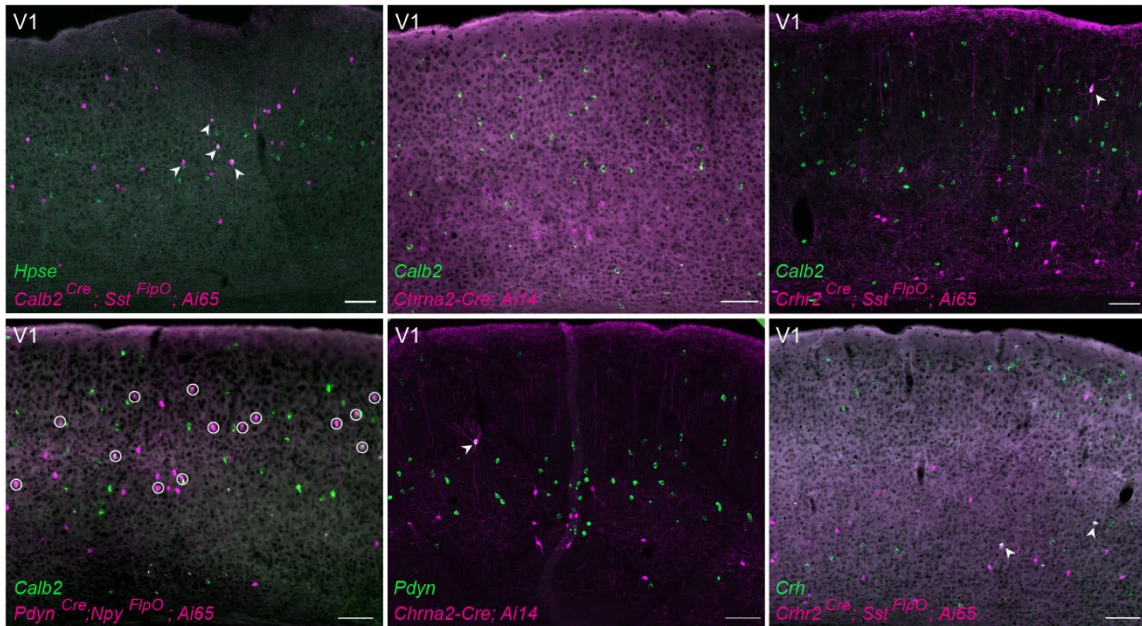

Percentage of probe+ neurons in genetically labeled SST interneurons

| S1    | <i>Calb2;SstPdyn;Npy</i> |               |              |              | <i>Chrna2</i> |               |              |              | <i>Crhr2;Sst</i> |      |      |     |
|-------|--------------------------|---------------|--------------|--------------|---------------|---------------|--------------|--------------|------------------|------|------|-----|
|       | Calb2                    | Hpse          | Pdyn         | Crh          | Calb2         | Hpse          | Pdyn         | Crh          | Calb2            | Hpse | Pdyn | Crh |
| Calb2 | 62.71 ± 9.07             | 18.12 ± 4.49  | 3.24 ± 2.05  | 2.70 ± 2.50  | 70.32 ± 14.40 | 41.53 ± 6.27  | 5.22 ± 3.65  | 6.65 ± 5.91  |                  |      |      |     |
| Hpse  | 11.19 ± 4.96             | 61.24 ± 12.53 | 3.27 ± 3.27  | 18.76 ± 4.70 | 16.95 ± 8.00  | 56.34 ± 11.35 | 1.83 ± 2.02  | 20.11 ± 6.35 |                  |      |      |     |
| Pdyn  | 69.14 ± 5.95             | 78.09 ± 18.11 | 16.67 ± 5.99 | 17.00 ± 5.99 | 74.01 ± 13.90 | 83.14 ± 16.21 | 15.37 ± 5.95 | 24.40 ± 8.20 |                  |      |      |     |
| Crh   | 8.82 ± 3.23              | 1.32 ± 1.49   | 7.75 ± 8.82  | 18.58 ± 8.82 | 8.76 ± 2.34   | 3.12 ± 1.88   | 9.70 ± 6.76  | 15.06 ± 6.19 |                  |      |      |     |

**B** *Etv1<sup>CreER</sup>;Sst<sup>FlpO</sup>* intersectional strategy may label SST-Mme and SST-Calb2 interneurons in addition to SST-Etv1 interneurons

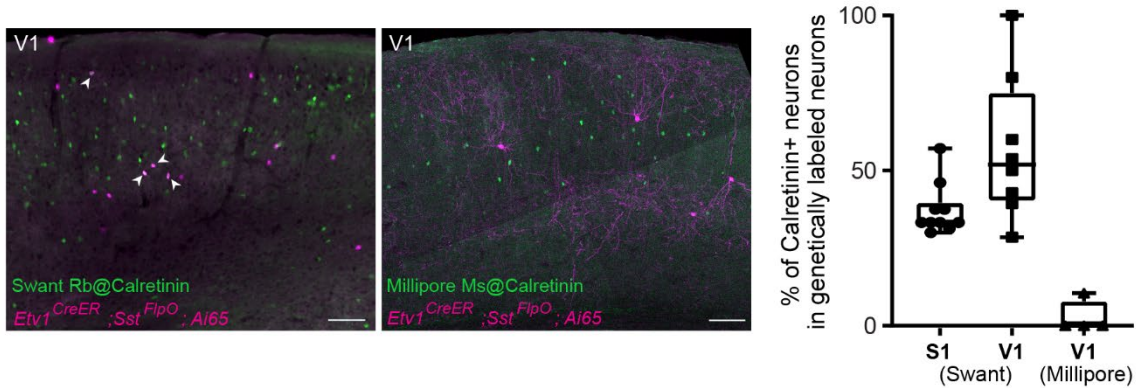

Figure S5. smFISH experiments against various marker genes for assessing the specificity of genetic targeting strategies. Related to Figure 2.

(A) Representative images of smFISH experiments against various marker genes on genetically labeled SST interneurons in V1. Circles or arrows indicating genetically labeled neurons (endogenous fluorescence, magenta) that are positive for the probe (green) against different genes. Scale bars, 100  $\mu$ m. Heatmaps show the percentage (mean  $\pm$  SD) of genetically labeled SST interneurons that showed probe expression in S1 and V1. All experiments were performed on 1-3 month old mice.

*Calb2<sup>Cre</sup>; Sst<sup>FlpO</sup>; Ai65* - *Calb2* probe: 3 mice, 287 genetically labeled neurons examined in S1; 3 mice, 346 neurons in V1. *Hpse* probe: 3 mice, 296 neurons in S1; 3 mice, 414 neurons in V1. *Pdyn* probe: 3 mice, 328 neurons in S1; 3 mice; 288 neurons in V1. *Crh* probe: 3 mice, 278 neurons in S1; 3 mice, 364 neurons in V1.

*Pdyn<sup>Cre</sup>; Npy<sup>FlpO</sup>; Ai65* - *Calb2* probe: 3 mice, 376 neurons in S1; 4 mice, 286 neurons in V1. *Hpse* probe: 5 mice, 846 neurons in S1; 4 mice, 280 neurons in V1. *Pdyn* probe: 5 mice, 630 neurons in S1; 4 mice, 341 neurons in V1. *Crh* probe: 3 mice, 364 neurons in S1; 3 mice, 247 neurons in V1.

*Chrna2-Cre; Ai14* - *Calb2* probe: 3 mice, 255 neurons in S1; 3 mice, 230 neurons in V1. *Hpse* probe: 4 mice, 393 neurons in S1; 3 mice, 150 neurons in V1. *Pdyn* probe: 3 mice, 420 neurons in S1; 4 mice, 303 neurons in V1. *Crh* probe: 3 mice, 266 neurons in S1; 3 mice, 198 neurons in V1.

*Crhr2<sup>Cre</sup>; Sst<sup>FlpO</sup>; Ai65* - *Calb2* probe: 3 mice, 360 neurons in S1; 4 mice, 321 neurons in V1. *Hpse* probe: 3 mice, 227 neurons in S1; 3 mice, 230 neurons in V1. *Pdyn* probe: 4 mice, 361 neurons in S1; 4 mice, 164 neurons in V1. *Crh* probe: 4 mice, 290 neurons in S1; 5 mice, 406 neurons in V1.

(B) Immunostaining against calretinin with two different antibodies showed different degrees of overlapping with genetically labeled SST interneurons. Arrows indicating genetically labeled neurons that are immunopositive for calretinin. Scale bars, 100  $\mu$ m. Calretinin antibody from Swant labeled many more neurons than the antibody from Millipore. *Etv1<sup>CreER</sup>; Sst<sup>FlpO</sup>* genetic strategy showed little overlapping using Millipore anti-calretinin antibody but ~50% overlapping using Swant antibody, suggesting that this genetic strategy likely labels SST interneurons with a low expression of calretinin. Since SST-Mme interneurons express a low level of calretinin, *Etv1<sup>CreER</sup>; Sst<sup>FlpO</sup>* genetic strategy likely labels SST-Mme interneurons besides SST-Etv1 interneurons. Furthermore, because this genetic strategy could label a variable amount of SST interneurons depending on the extent of recombination, it is possible that some SST-Calb2 interneurons are also labeled by this genetic strategy with a high degree of recombination. Swant antibody: 3 mice, 108 genetically labeled neurons examined in S1; 2 mice, 94 genetically labeled neurons examined in V1. Millipore antibody: 2 mice, 52 genetically labeled neurons examined in V1. Experiments were performed on 3-month-old mice.

| Parameter                        | SST-Calb2<br>mean $\pm$ SD<br>n = 21 | SST-Myh8<br>mean $\pm$ SD<br>n = 12 | SST-Nmbr<br>mean $\pm$ SD<br>n = 13 | p Value          |
|----------------------------------|--------------------------------------|-------------------------------------|-------------------------------------|------------------|
| <b>Vrest (mV)</b>                | 53.26 $\pm$ 0.84                     | 47.27 $\pm$ 1.28                    | 57.65 $\pm$ 0.95                    | <b>&lt;.0001</b> |
| <b>IR (M<math>\Omega</math>)</b> | 311.09 $\pm$<br>12.25                | 323.64 $\pm$ 23.39                  | 256.73 $\pm$ 24.63                  | .097             |
| <b>Sag ratio</b>                 | 0.92 $\pm$ 0.01                      | 0.91 $\pm$ 0.01                     | 0.93 $\pm$ 0.01                     | .128             |
| <b>AP Amplitude (mV)</b>         | 110.46 $\pm$ 1.98                    | 97.63 $\pm$ 2.7                     | 107.14 $\pm$ 3.78                   | <b>.007</b>      |
| <b>AP Half-Width (ms)</b>        | 1.07 $\pm$ 0.05                      | 1.32 $\pm$ 0.1                      | 1.02 $\pm$ 0.08                     | <b>.029</b>      |
| <b>AP Max Rise (mV/ms)</b>       | 316.39 $\pm$ 14.6                    | 230.20 $\pm$ 23.52                  | 290.08 $\pm$ 29.98                  | <b>.025</b>      |
| <b>AHP Amplitude (mV)</b>        | 14.68 $\pm$ 1.23                     | 12.69 $\pm$ 1.36                    | 16.83 $\pm$ 1.48                    | .177             |
| <b>AP Threshold (mV)</b>         | 40.40 $\pm$ 0.49                     | 38.99 $\pm$ 1.26                    | 38.93 $\pm$ 1.03                    | .213             |
| <b>HFF (hZ)</b>                  | 52 $\pm$ 3.87                        | 48.58 $\pm$ 6.3                     | 74 $\pm$ 4.64                       | <b>.004</b>      |
| <b>Adaptation</b>                | 2.20 $\pm$ 0.14                      | 2.26 $\pm$ 0.12                     | 1.69 $\pm$ 0.14                     | <b>.042</b>      |
| <b>Rebound APs</b>               | 1.48 $\pm$ 0.46                      | 6.42 $\pm$ 0.61                     | 0 $\pm$ 0                           | <b>&lt;.0001</b> |

**Table S5. Electrophysiological properties of SST-Calb2, SST-Myh8, and SST-Nmbr interneurons in S1. Related to Figure S3.**

Mean  $\pm$  SEM is reported for all electrophysiology parameters measured. The p-value of the F statistic reports which parameters showed significantly different distributions by one-way ANOVA. Individual mean comparisons with Tukey correction: Vrest: SST-Calb2 vs. SST-Myh8 p = .0002, SST-Calb2 vs. SST-Nmbr p = .01, SST-Myh8 vs. SST-Nmbr p < .0001; AP Amplitude: SST-Calb2 vs. SST-Myh8 p = .005; AP halfwidth: SST-Myh8 vs. SST-Nmbr p = .04; AP Max Rise: SST-Calb2 vs. SST-Myh8 p = .02; HFF: SST-Calb2 vs. SST-Nmbr p = .02, SST-Myh8 vs. SST-Nmbr p = .006; Adaptation: SST-Myh8 vs. SST-Nmbr p = .03; Rebound APs: SST-Calb2 vs. SST-Nmbr p < .0001, SST-Calb2 vs. SST-Nmbr p = .02, SST-Myh8 vs. SST-Nmbr p < .0001.

| Parameter                        | L2/3<br>SST-Calb2<br>mean $\pm$ SD<br>n = 10 | L5a<br>SST-Calb2<br>mean $\pm$ SD<br>n = 11 | p Value     |
|----------------------------------|----------------------------------------------|---------------------------------------------|-------------|
| <b>Vrest (mV)</b>                | 52.26 $\pm$ 1.03                             | 54.17 $\pm$ 1.28                            | .266        |
| <b>IR (M<math>\Omega</math>)</b> | 329.43 $\pm$ 22.67                           | 294.42 $\pm$ 30.66                          | .377        |
| <b>Sag ratio</b>                 | 0.91 $\pm$ 0.01                              | 0.92 $\pm$ 0.01                             | .274        |
| <b>AP Amplitude (mV)</b>         | 110.39 $\pm$ 2.78                            | 110.53 $\pm$ 2.94                           | .973        |
| <b>AP Half-Width (ms)</b>        | 1.09 $\pm$ 0.08                              | 1.05 $\pm$ 0.05                             | .720        |
| <b>AP Max Rise (mV/ms)</b>       | 316.28 $\pm$ 23.94                           | 316.49 $\pm$ 18.57                          | .994        |
| <b>AHP Amplitude (mV)</b>        | 15.81 $\pm$ 1.74                             | 13.65 $\pm$ 1.76                            | .395        |
| <b>AP Threshold (mV)</b>         | 40.10 $\pm$ 0.58                             | 40.68 $\pm$ 0.8                             | .570        |
| <b>HFF (Hz)</b>                  | 51.9 $\pm$ 7.42                              | 52.09 $\pm$ 3.5                             | .981        |
| <b>Adaptation</b>                | 1.88 $\pm$ 0.14                              | 2.46 $\pm$ 0.19                             | <b>.037</b> |
| <b>Rebound APs</b>               | 1.7 $\pm$ 0.63                               | 1.27 $\pm$ 0.68                             | .652        |

**Table S6. Electrophysiological properties of SST-Calb2 interneurons in L2/3 and L5 in S1. Related to Figure S3.**

Mean  $\pm$  SEM is reported for all electrophysiology parameters measured. The p-value reports which parameters were significantly different across layers by t-test.



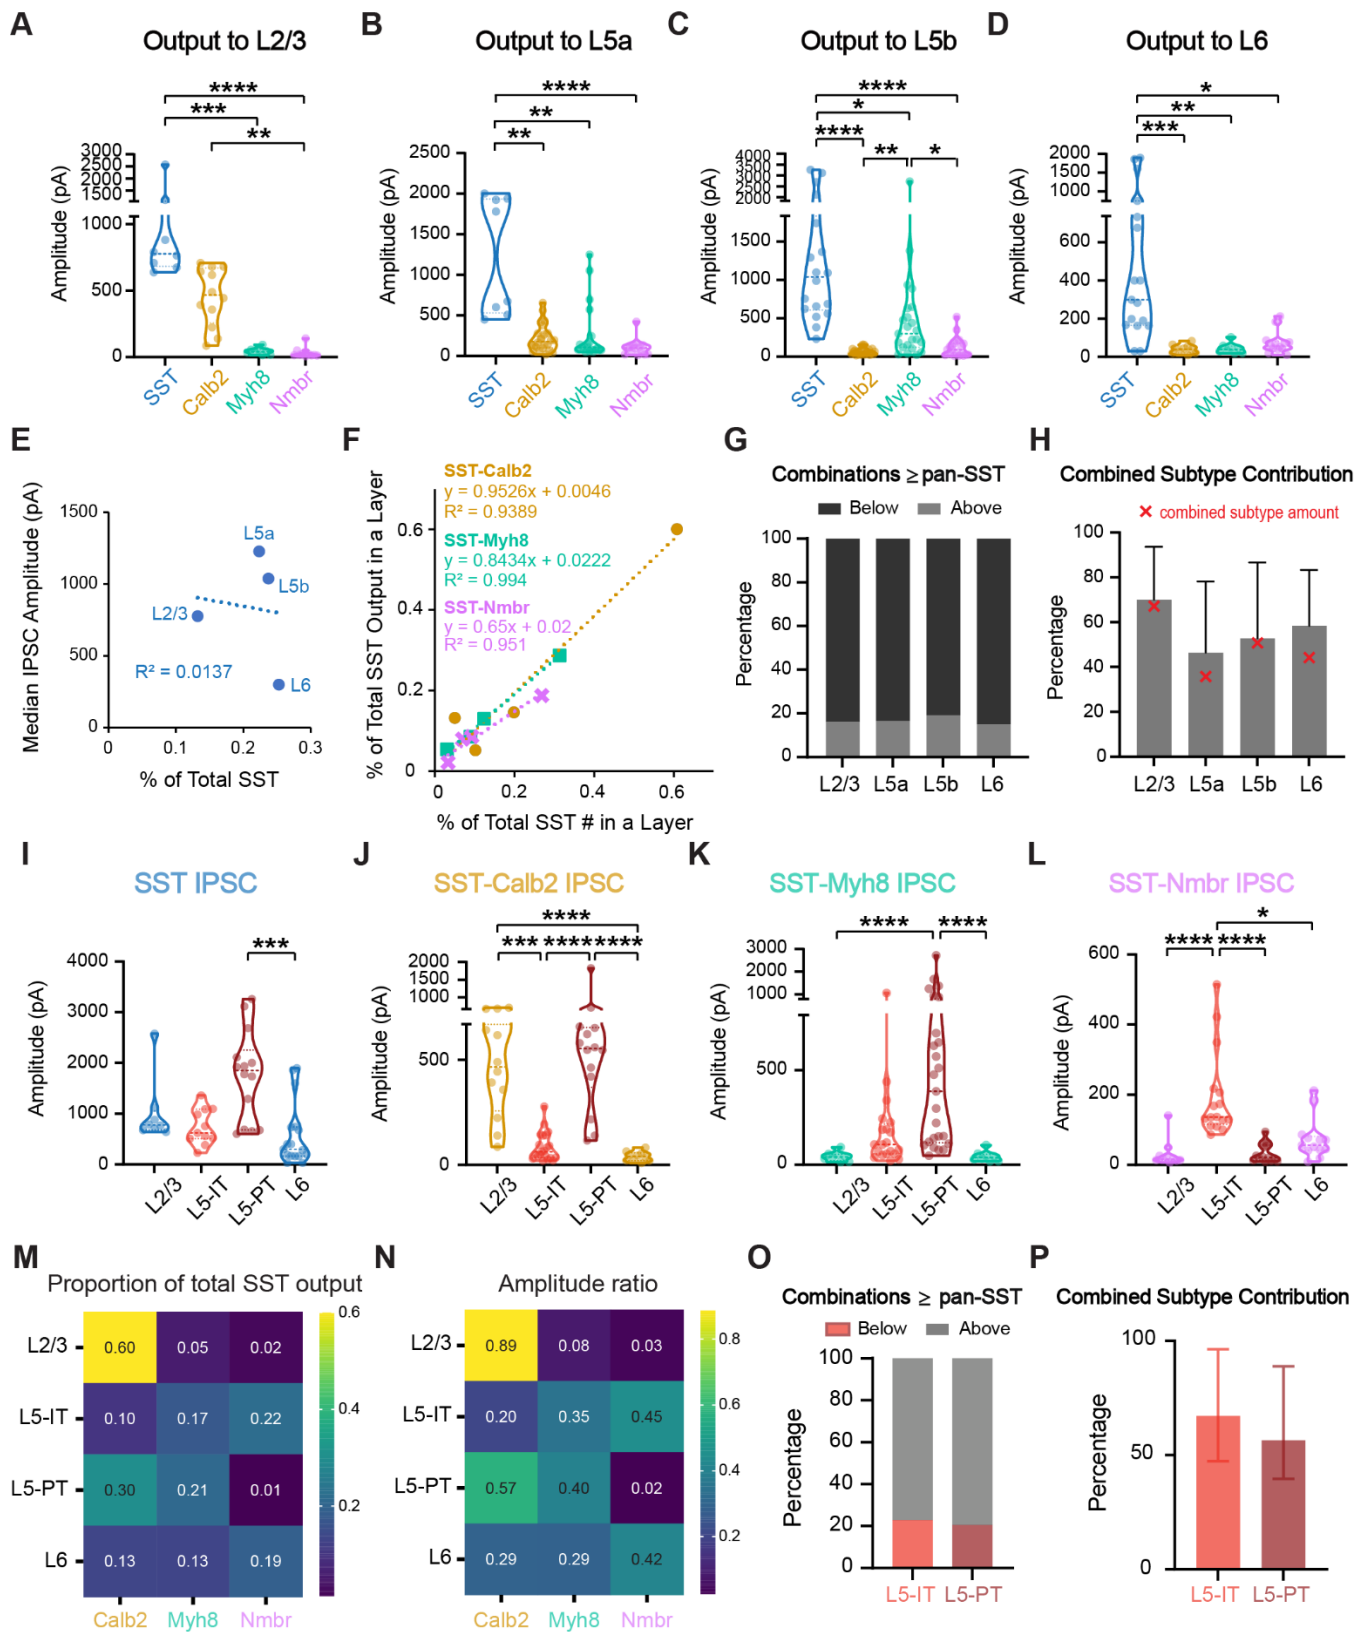

**Figure S6. Pyramidal neurons receive laminar and cell-type specific input from different SST subtypes. Related to Figure 3 and Figure 4.**

(A) Violin plot of evoked IPSC in L2/3 pyramidal neurons (pan-SST n = 8, 3 mice; SST-Calb2: n = 12, 7 mice; SST-Myh8: n = 8, 5 mice; SST-Nmbr: n = 10, 6 mice). Pan-SST interneuron response was not significantly greater than SST-Calb2 ( $p = .5437$ ) but was greater than SST-Myh8 ( $p = .0008$ ) and SST-Nmbr ( $p < .0001$ ). SST-Calb2 was significantly greater than SST-Nmbr ( $p = .0016$ ). Kruskal-Wallis test with Dunn's correction.

(B) Evoked IPSC in L5a pyramidal neurons (pan-SST: n = 8, 4 mice; SST-Calb2: n = 24, 8 mice; SST-Myh8: n = 20, 7 mice; SST-Nmbr: n = 14, 5 mice). Pan-SST interneuron response was greater than all three subtypes (pan-SST vs. SST-Calb2  $p = .0079$ , vs. SST-Myh8  $p = .0012$ , vs. SST-Nmbr  $p < .0001$ ). Kruskal-Wallis test with Dunn's correction.

(C) Evoked IPSC in L5b pyramidal neurons (pan-SST: n = 18, 6 mice; SST-Calb2: n = 24, 9 mice; SST-Myh8: n = 23, 7 mice; SST-Nmbr: n = 20, 6 mice). Pan-SST interneuron response was greater than all three subtypes (pan-SST vs. SST-Calb2  $p < .0001$ , vs. SST-Myh8  $p = .0349$ , vs. SST-Nmbr  $p < .0001$ ). SST-Myh8 response was significantly greater than SST-Calb2 ( $p = .0011$ ) and SST-Nmbr ( $p = .0195$ ). Kruskal-Wallis test with Dunn's correction.

(D) Evoked IPSC in L6 pyramidal neurons (pan-SST: n = 17, 5 mice; SST-Calb2: n = 10, 4 mice; SST-Myh8: n = 8, 5 mice; SST-Nmbr: n = 13, 5 mice). Pan-SST interneuron response was greater than all three subtypes (pan-SST vs. SST-Calb2  $p = .0004$ , vs. SST-Myh8  $p = .0017$ , vs. SST-Nmbr  $p = .0170$ ). Kruskal-Wallis test with Dunn's correction.

(E) Percentage of the number of SST interneurons residing in a particular layer out of the total number of SST interneurons does not correlate with the percentage of the inhibitory output by total SST interneurons in each layer.

(F) Same plot as [Figure 3I](#) with data points from different SST subtypes separately labeled.

(G) Random combinations of SST-Calb2, SST-Myh8, and SST-Nmbr IPSC amplitudes were combined and compared to a pan-SST evoked IPSC amplitude (see [STAR Methods](#)). Graph of the percent of simulations where the difference was below (light grey) and above (dark grey) zero.

(H) The proportion of the pan-SST response accounted for by a linear combination of SST-Calb2, SST-Myh8, and SST-Nmbr inputs. Graph of median ratios. Error bars are interquartile ranges. Red crosses indicate the percentage of the combined amount of three SST subtypes out of the total SST interneurons in each layer.

(I) Quantification of the evoked IPSC amplitude upon pan-SST stimulation across pyramidal neuron types (L2/3: n = 8, 3 mice; L5-IT: n = 11, 3 mice; L5-PT: n = 14, 3 mice; L6: n = 17, 5 mice). L5-PT IPSC was significantly greater than L6 ( $p = .0003$ ), all other comparisons not significant (L2/3 vs. L6  $p = .1634$ , L5-IT vs. L5-PT  $p = .0641$ , rest  $p > .9999$ ). Kruskal-Wallis test with Dunn's correction.

(J) As in (I) for SST-Calb2 interneurons (L2/3: n = 12, 7 mice; L5-IT: n = 21, 5 mice, L5-PT: n = 14, 3 mice; L6: n = 10, 4 mice). IPSC was significantly greater in L2/3 and L5-PT neurons than L5-IT or L6 neurons (L2/3 vs. L5-IT  $p = .0007$ , L2/3 vs. L6  $p < .0001$ , L5-PT vs. L5-IT and L5-PT vs. L6  $p < .0001$ ). Kruskal-Wallis test with Dunn's correction.

(K) As in (I) for SST-Myh8 interneurons (L2/3: n = 8, 5 mice; L5-IT: n = 20, 3 mice; L5-PT: n = 25, 4 mice; L6: n = 8, 5 mice). IPSCs in L5-PT neurons were significantly greater than that L2/3 and L6 (L2/3 vs. L5-PT, L5-PT vs. L6,  $p < .0001$ ). Kruskal-Wallis test with Dunn's correction.

(L) As in (I) but for SST-Nmbr interneurons (L2/3: n = 10, 6 mice; L5-IT: n = 16, 3 mice; L5-PT: n = 14, 3 mice; L6: n = 13, 5 mice). IPSC in L5-IT neurons was significantly greater than in all other cell types (L2/3 vs. L5-IT  $p < .0001$ , L5-IT vs. L5-PT  $p < .0001$ , L5-IT vs. L6  $p = .0307$ ). Kruskal-Wallis test with Dunn's correction.

(M) Heatmap of the proportion of inhibition from individual SST subtype as compared to the inhibition from pan-SST interneurons in different layers and pyramidal neuron cell types.

(N) The ratio of IPSC amplitude for each SST subtype, out of the sum of the three SST subtypes. The combined median IPSC amplitude of the three subtypes is normalized to 1 for a particular layer or pyramidal neuron cell type.

(O) Random combinations of SST-Calb2, SST-Myh8, and SST-Nmbr IPSC amplitudes were combined and compared to a pan-SST evoked IPSC amplitude ([see STAR Methods](#)). Graph of the percentage of simulations where the difference was below (pink/red) and above (grey) zero.

(P) The proportion of the pan-SST response accounted for by a linear combination of SST-Calb2, SST-Myh8, and SST-Nmbr outputs. Graph of median ratios. Error bars are interquartile ranges.

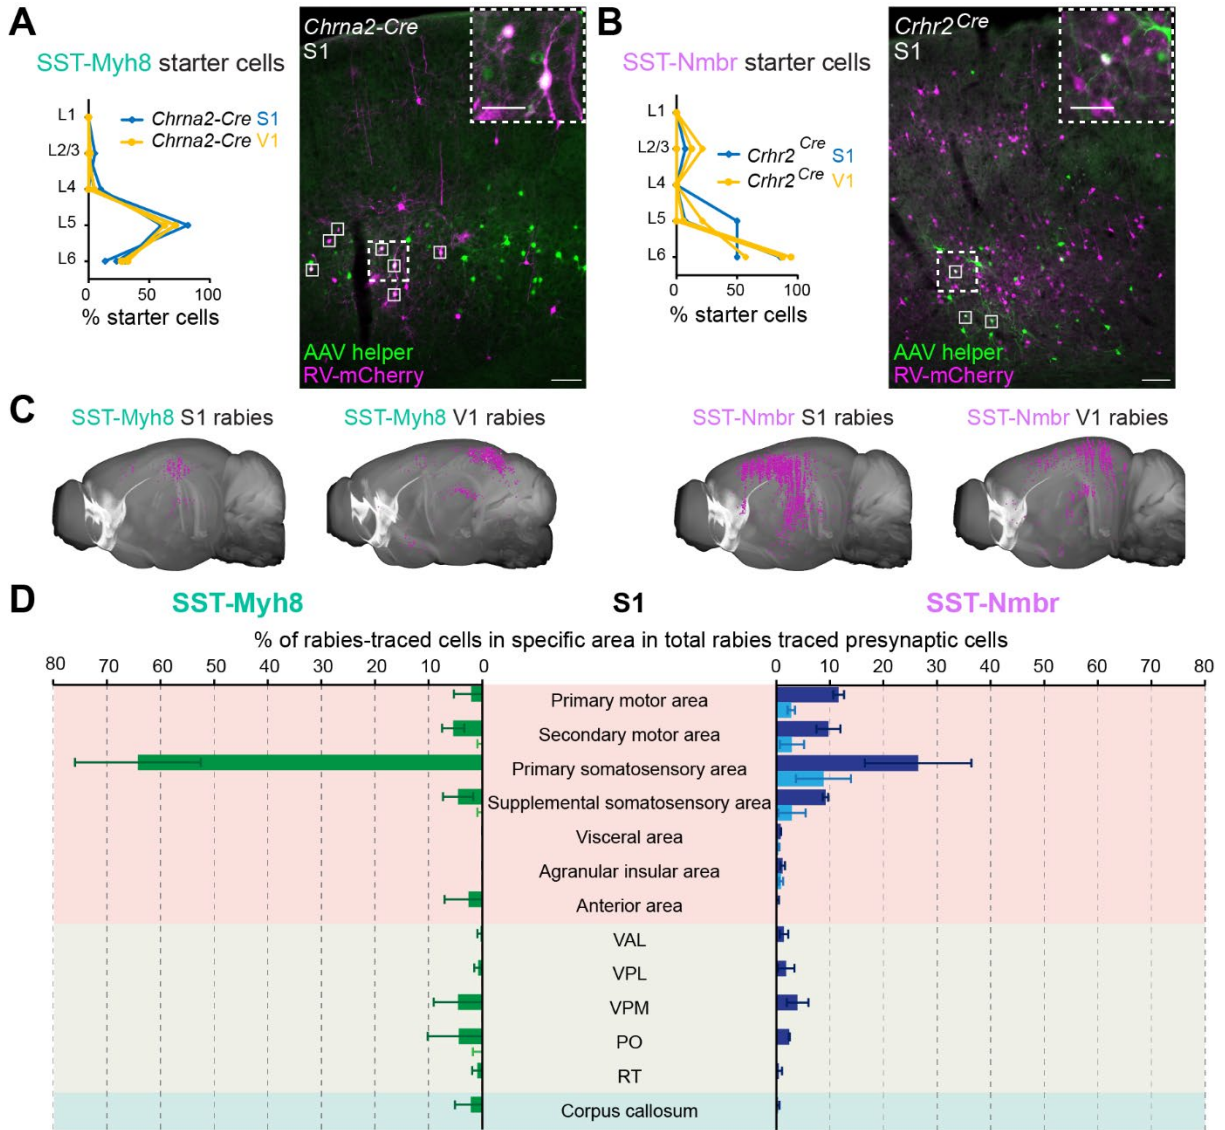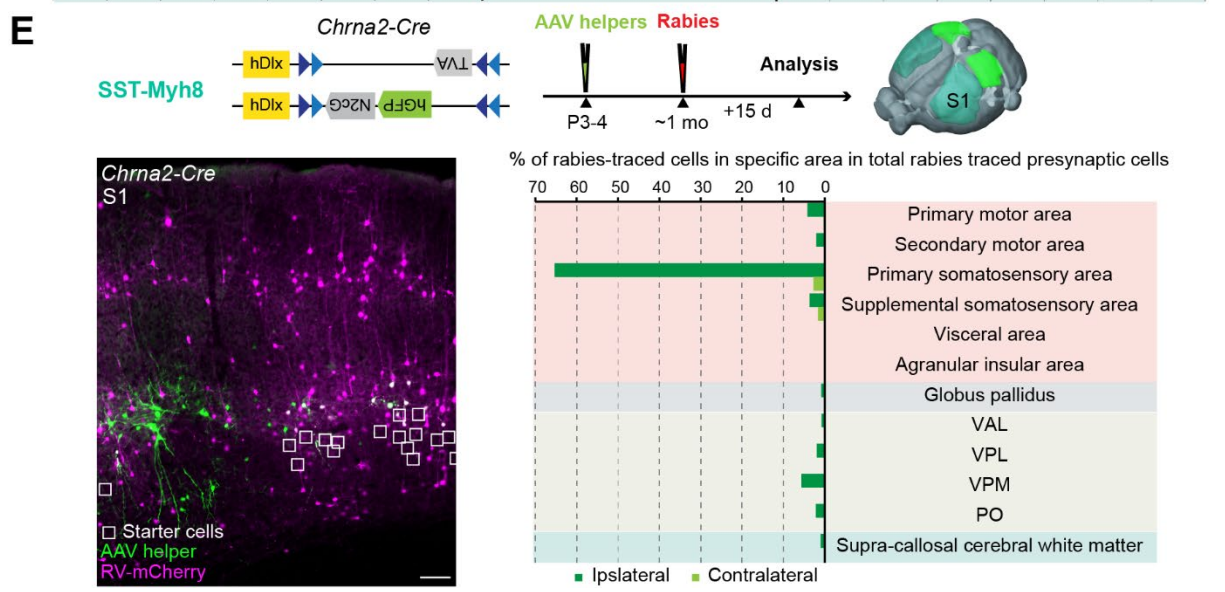

**Figure S7. Monosynaptic rabies tracing starter cells, rabies tracing results in S1, and one test experiment using the matching AAV helper viruses for rabies tracing from SST-Myh8 subtype as used for SST-Nmbr interneurons. Related to Figure 6.**

- (A) Laminar distribution of rabies-infected starter cells for rabies tracing experiments from SST-Myh8 and SST-Nmbr interneurons in S1 and V1 (left). Representative images showing starter cells of SST-Myh8 and SST-Nmbr interneurons (right). Neurons expressing AAV-helpers are in green, Rabies (RV) in magenta and starter cells (squares) are identified by both channels. Scale bar, 100  $\mu$ m. (Inset) Higher magnification image of starter cell examples inside the region labeled by the dashed square.
- (B) Same as (A) for rabies tracing experiments from SST-Nmbr interneurons in S1 and V1.
- (C) Representative examples of rabies retrograde labeling from SST-Myh8 and SST-Nmbr interneurons in S1 and V1 using Neuroinfo 3D rendering. Magenta dots represent the location of rabies-traced presynaptic neurons.
- (D) Presynaptic inputs to SST-Myh8 and SST-Nmbr interneurons in S1 quantified as the percentage of rabies traced cells in each regional category out of the total number of cells labeled in the brain (n = 3 for SST-Myh8, n = 2 for SST-Nmbr). The top 10 input regional categories for either SST subtype are included in the plot.
- (E) One rabies tracing experiment of SST-Myh8 interneurons using the same AAV-helper viruses used for rabies tracing experiments from SST-Nmbr interneurons. (top) Schematics of experimental design. The construct of AAV-DIO-helper viruses and the timeline of AAV-helpers and N2cRV injections for tracing from SST-Myh8 in S1 using *Chrna2-Cre* mouse line are illustrated. Rabies tracing patterns were analyzed 15 days post-infection. (bottom left) Representative image showing the starter cells. (bottom right) Presynaptic inputs identified were quantified as the percentage of rabies-traced cells in each regional category out of the total number of presynaptic neurons labeled in the brain. Top 10 input regional categories are included in the plot.
- Abbreviations for thalamic regions: ventral anterior-lateral complex of the thalamus (VAL), ventral posterolateral nucleus of the thalamus (VPL), ventral posteromedial nucleus of the thalamus (VPM), posterior complex of the thalamus (PO), reticular nucleus of the thalamus (RT).

## SST-Myh8 rabies

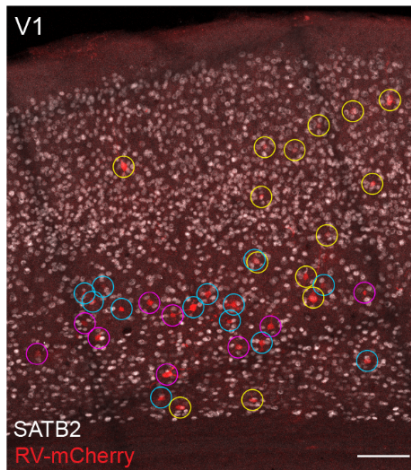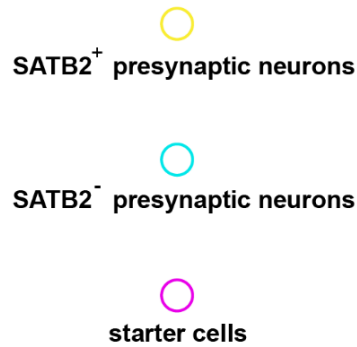

## SST-Nmbr rabies

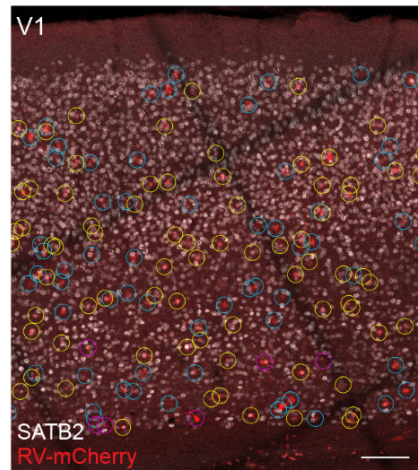

### S1 exp#1

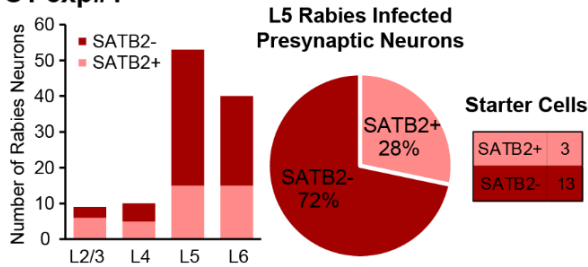

### S1 exp#1

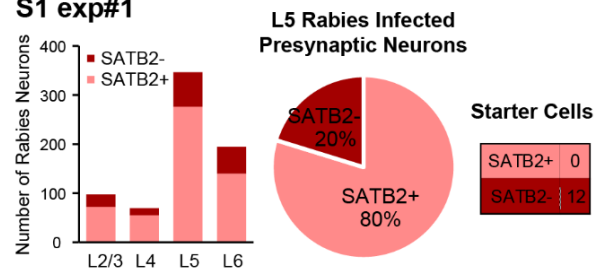

### S1 exp#2

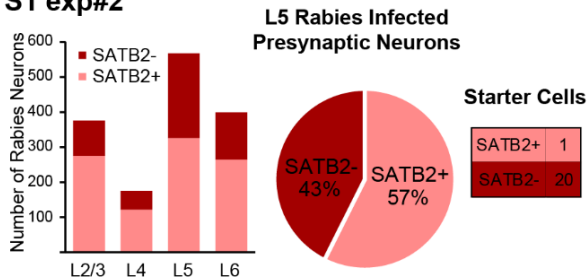

### S1 exp#2

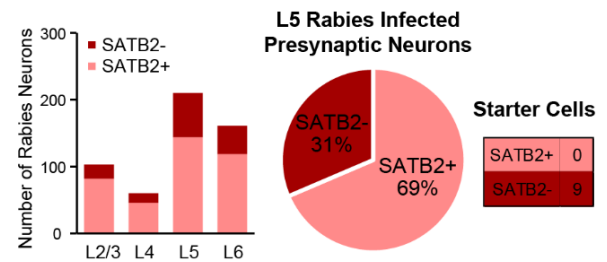

### V1 exp#2

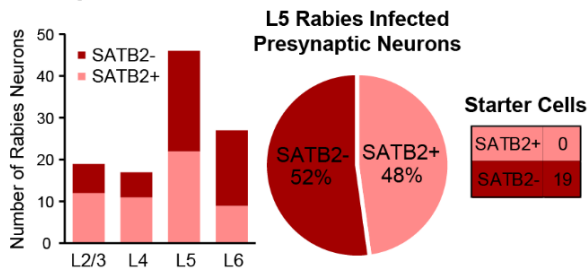

### V1 exp#2

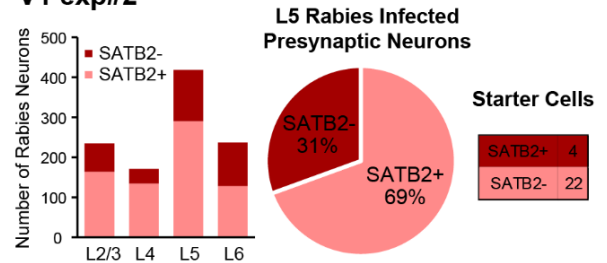

### V1 exp#3

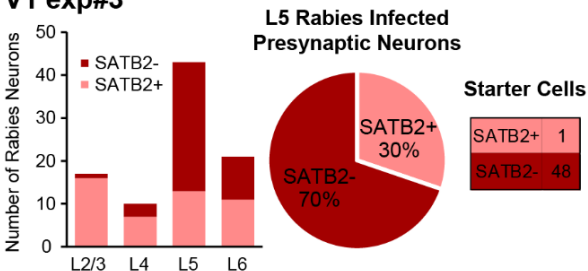

**Figure S8. The identity of rabies-traced local presynaptic neurons to two SST subtypes. Related to Figure 6.**

(left column from top to bottom) Representative image of immunostaining against SATB2 (white) on a brain slice with rabies traced presynaptic neurons (red) targeting SST-Myh8 interneurons in V1. Yellow circles indicate SATB2+ rabies traced presynaptic neurons. Cyan circles indicate SATB2- rabies traced presynaptic neurons. Magenta circles indicate starter cells. Quantification from individual rabies tracing experiments is shown below. For each experiment, a histogram of rabies traced neurons in each layer (left); a pie chart of the numbers of SATB2+ versus SATB2- rabies infected presynaptic neurons in L5 (middle), and a table shows the number of starter cells (right) are shown. Note that there are occasionally a small number of SATB2+ pyramidal neuron starter cells, due to the challenge of specifically targeting a small interneuron population that only constitutes ~2% of all cortical neurons. (right column) same elements for rabies tracing experiments from SST-Nmbr interneurons.

**Table S7. Summary of data and statistical analysis. Related to Figure 3-5, 7.**

| Figure Panel | N                                                                                                         | Statistical Test                                                                                                                                                                                                                                                      | P value                                                                                                                                                                                                                  |
|--------------|-----------------------------------------------------------------------------------------------------------|-----------------------------------------------------------------------------------------------------------------------------------------------------------------------------------------------------------------------------------------------------------------------|--------------------------------------------------------------------------------------------------------------------------------------------------------------------------------------------------------------------------|
| Figure 3C    | L2/3: n = 8, 3 mice<br>L5a: n = 8, 4 mice<br>L5b: n = 18, 6 mice<br>L6: n = 17, 5 mice<br>total 6 mice    | Linear mixed model with fixed factor only and multiple comparison with Bonferroni adjustment (test a)<br>Kruskal-Wallis test with Dunn's correction (test b)<br>(Note that linear mixed model with animal ID as random factor showed animal ID as a redundant factor) | Type III of fixed effect [Cortical Layer], p = .050; Estimates of fixed effect L5b, p = .009 (test a)<br>L5b vs L6, p = .0178 (test b)                                                                                   |
| Figure 3D    | L2/3: n = 12, 7 mice<br>L5a: n = 24, 8 mice<br>L5b: n = 24, 9 mice<br>L6: n = 10, 4 mice<br>total 12 mice | linear mixed model with animal ID as random factor and multiple comparison with Bonferroni adjustment                                                                                                                                                                 | Type III of fixed effect [Cortical Layer], p < .001<br>Estimates of fixed effect: L5a p = .012<br>Pairwise comparison:<br>L2/3 vs L5a, p < .001<br>L2/3 vs L5b, p < .001<br>L2/3 vs L6, p < .001<br>L5a vs L5b, p = .008 |
| Figure 3E    | L2/3: n = 8, 5 mice<br>L5a: n = 20, 7 mice<br>L5b: n = 23, 7 mice<br>L6: n = 8, 5 mice<br>total 10 mice   | linear mixed model with animal ID as random factor and multiple comparison with Bonferroni adjustment                                                                                                                                                                 | Type III of fixed effect [Cortical Layer], p = .047<br>Estimates of fixed effect: L5b, p = .025                                                                                                                          |
| Figure 3F    | L2/3: n = 10, 6 mice<br>L5a: n = 14, 5 mice<br>L5b: n = 20, 6 mice<br>L6: n = 13, 5 mice<br>total 12 mice | linear mixed model with animal ID as random factor                                                                                                                                                                                                                    | Type III of fixed effect [Cortical Layer], p = .056<br>Estimates of fixed effect, n.s.                                                                                                                                   |
| Figure 4D    | pan-SST to<br>IT neurons: n = 11, 3 mice<br>PT neurons: n = 14, 3 mice                                    | nested t-test                                                                                                                                                                                                                                                         | p = .0018                                                                                                                                                                                                                |
| Figure 4E    | SST-Calb2 to<br>IT neurons: n = 21, 5 mice<br>PT neurons: n = 14, 3 mice                                  | nested t-test on rank transformed data                                                                                                                                                                                                                                | p = .0026                                                                                                                                                                                                                |
| Figure 4F    | SST-Myh8 to<br>IT neurons n = 20, 4 mice<br>PT neurons n = 25, 4 mice                                     | nested t-test on rank transformed data                                                                                                                                                                                                                                | p = .0442                                                                                                                                                                                                                |
| Figure 4G    | SST-Nmbr to<br>IT neurons n = 16, 3 mice<br>PT neurons n = 14, 3 mice                                     | nested t-test on rank transformed data                                                                                                                                                                                                                                | p = .0048                                                                                                                                                                                                                |
| Figure 4I    | See above                                                                                                 | Kruskal-Wallis test with Dunn's correction for multiple comparisons                                                                                                                                                                                                   | pan-SST vs. SST-Calb2 p < .0001<br>pan-SST vs. SST-Myh8 p = .0002<br>pan-SST vs. SST-Nmbr p = .0254<br>SST-Calb2 vs. SST-Nmbr p = .0288                                                                                  |



|           |                                                                                                                                                                                    |                                                                                                                                                                                                                                                  |                                                                                                                                                                                                                                                                                                                         |
|-----------|------------------------------------------------------------------------------------------------------------------------------------------------------------------------------------|--------------------------------------------------------------------------------------------------------------------------------------------------------------------------------------------------------------------------------------------------|-------------------------------------------------------------------------------------------------------------------------------------------------------------------------------------------------------------------------------------------------------------------------------------------------------------------------|
| Figure 4J | See above                                                                                                                                                                          | Kruskal-Wallis test with Dunn's correction for multiple comparisons                                                                                                                                                                              | pan-SST vs. SST-Calb2 p = .0515<br>pan-SST vs. SST-Myh8 p = .0033<br>pan-SST vs. SST-Nmbr p < .0001<br>SST-Calb2 vs. SST-Nmbr p = .0005<br>SST-Myh8 vs SST-Nmbr p = .0004                                                                                                                                               |
| Figure 5D | SST-Calb2 to PV<br>L2/3: n = 9, L5/6: n = 11, 3 mice<br>SST-Myh8 to PV<br>L2/3: n = 9, L5/6: n = 13, 3 mice<br>SST-Nmbr to PV<br>L2/3: n = 8, L5/6: n = 17, 4 mice                 | linear mixed model with animal ID as the random factor                                                                                                                                                                                           | SST-Calb2: L2/3 PV vs L5/6 PV p = .006<br>SST-Myh8: L2/3 PV vs L5/6 PV p = .088<br>SST-Nmbr: L2/3 PV vs L5/6 PV p = .127<br>p values reflect both type III test of fixed effect and estimates of fixed effect                                                                                                           |
| Figure 5E | See above                                                                                                                                                                          | Kruskal-Wallis test                                                                                                                                                                                                                              | Output to L2/3 PV:<br>SST-Calb2 vs SST-Myh8 p = .0062<br>SST-Calb2 vs SST-Nmbr p = .0005                                                                                                                                                                                                                                |
| Figure 7F | SST-Calb2 puncta on L5-PT dendritic compartments<br>tuft n = 16 ROIs<br>apical branch n = 16 ROIs<br>trunk n = 23 ROIs<br>oblique n = 25 ROIs<br>basal n = 15 ROIs<br>total 3 mice | Linear mixed model with fixed factor only and multiple comparison with Bonferroni adjustment<br>(Note that Linear mixed model using dendritic compartment as fixed factor and animal ID as random factor showed animal ID is a redundant factor) | Type III tests of fixed effect [Dendritic Compartments], p < .001<br>Estimates of fixed effects: trunk p = .011, oblique p < .001, basal p < .001<br>Pairwise comparison:<br>tuft vs. oblique p = .002<br>tuft vs. basal p < .001<br>apical branch vs. basal p = .006<br>apical branch vs. oblique p = .039             |
| Figure 7G | SST-Myh8 puncta on L5-PT dendritic compartments<br>tuft n = 18 ROIs<br>apical branch n = 25 ROIs<br>trunk n = 17 ROIs<br>oblique n = 16 ROIs<br>basal n = 18 ROIs<br>total 3 mice  | Linear mixed model with fixed factor only and multiple comparison with Bonferroni adjustment<br>(Note that Linear mixed model using dendritic compartment as fixed factor and animal ID as random factor showed animal ID is a redundant factor) | Type III tests of fixed effect [Dendritic Compartments], p < .001<br>Estimates of fixed effects: apical branch p < .001, trunk p < .001, oblique p < .001, basal p < .001<br>Pairwise comparison:<br>tuft vs. apical branch p < .001<br>tuft vs. trunk p < .001<br>tuft vs. oblique p < .001<br>tuft vs. basal p < .001 |
| Figure 7H | See above                                                                                                                                                                          | Mann-Whitney test                                                                                                                                                                                                                                | SST-Calb2 vs SST-Myh8 on<br>tuft p = .0001<br>apical branch p < .0001<br>trunk p = .0103<br>oblique p = .0016<br>basal p = .0396                                                                                                                                                                                        |
